# Supplementary material for: The deubiquitinase OTUD1 regulates immunoglobulin production and proteasome inhibitor sensitivity in multiple myeloma
Source: PubMed Central journal article supplement (PMC9649770; doi:10.1038/s41467-022-34654-2), 2022-11-10
Supplement: 41467_2022_34654_MOESM3_ESM.pdf [file 41467_2022_34654_MOESM3_ESM.pdf]

## **Description of Additional Supplementary Files**

**Supplementary Data 1:** Genes uniquely expressed in plasma cells compare to other B-cell developmental stages

**Supplementary Data 2:** Proteomic analysis of OTUD1 interactors

**Supplementary Data 3:** Oligonucleotides used in the study
