# Supplementary material for: The deubiquitinase OTUD1 regulates immunoglobulin production and proteasome inhibitor sensitivity in multiple myeloma
Source: PubMed Central journal article supplement (PMC9649770; doi:10.1038/s41467-022-34654-2), 2022-11-10
Supplement: 41467_2022_34654_MOESM7_ESM.pdf [file 41467_2022_34654_MOESM7_ESM.pdf]

## Reporting Summary

Nature Portfolio wishes to improve the reproducibility of the work that we publish. This form provides structure for consistency and transparency in reporting. For further information on Nature Portfolio policies, see our [Editorial Policies](#) and the [Editorial Policy Checklist](#).

### Statistics

For all statistical analyses, confirm that the following items are present in the figure legend, table legend, main text, or Methods section.

- |                                     |                                                                                                                                                                                                                                                                                                |
|-------------------------------------|------------------------------------------------------------------------------------------------------------------------------------------------------------------------------------------------------------------------------------------------------------------------------------------------|
| n/a                                 | Confirmed                                                                                                                                                                                                                                                                                      |
| <input type="checkbox"/>            | <input checked="" type="checkbox"/> The exact sample size ( $n$ ) for each experimental group/condition, given as a discrete number and unit of measurement                                                                                                                                    |
| <input type="checkbox"/>            | <input checked="" type="checkbox"/> A statement on whether measurements were taken from distinct samples or whether the same sample was measured repeatedly                                                                                                                                    |
| <input type="checkbox"/>            | <input checked="" type="checkbox"/> The statistical test(s) used AND whether they are one- or two-sided<br><i>Only common tests should be described solely by name; describe more complex techniques in the Methods section.</i>                                                               |
| <input checked="" type="checkbox"/> | <input type="checkbox"/> A description of all covariates tested                                                                                                                                                                                                                                |
| <input checked="" type="checkbox"/> | <input type="checkbox"/> A description of any assumptions or corrections, such as tests of normality and adjustment for multiple comparisons                                                                                                                                                   |
| <input type="checkbox"/>            | <input checked="" type="checkbox"/> A full description of the statistical parameters including central tendency (e.g. means) or other basic estimates (e.g. regression coefficient) AND variation (e.g. standard deviation) or associated estimates of uncertainty (e.g. confidence intervals) |
| <input type="checkbox"/>            | <input checked="" type="checkbox"/> For null hypothesis testing, the test statistic (e.g. $F$ , $t$ , $r$ ) with confidence intervals, effect sizes, degrees of freedom and $P$ value noted<br><i>Give <math>P</math> values as exact values whenever suitable.</i>                            |
| <input checked="" type="checkbox"/> | <input type="checkbox"/> For Bayesian analysis, information on the choice of priors and Markov chain Monte Carlo settings                                                                                                                                                                      |
| <input checked="" type="checkbox"/> | <input type="checkbox"/> For hierarchical and complex designs, identification of the appropriate level for tests and full reporting of outcomes                                                                                                                                                |
| <input type="checkbox"/>            | <input checked="" type="checkbox"/> Estimates of effect sizes (e.g. Cohen's $d$ , Pearson's $r$ ), indicating how they were calculated                                                                                                                                                         |

*Our web collection on [statistics for biologists](#) contains articles on many of the points above.*

### Software and code

Policy information about [availability of computer code](#)

|                 |                                                                                                                                                                                                                                                                                                                                                                                                                                                                                                                                                                                                                                                                                                                                                                                                                                                                                                                                                                                                                                                                                                       |
|-----------------|-------------------------------------------------------------------------------------------------------------------------------------------------------------------------------------------------------------------------------------------------------------------------------------------------------------------------------------------------------------------------------------------------------------------------------------------------------------------------------------------------------------------------------------------------------------------------------------------------------------------------------------------------------------------------------------------------------------------------------------------------------------------------------------------------------------------------------------------------------------------------------------------------------------------------------------------------------------------------------------------------------------------------------------------------------------------------------------------------------|
| Data collection | <p>All qPCR data was collected using StepOne™ Software v2.3 ( available at <a href="https://www.thermofisher.com/cz/en/home/technical-resources/software-downloads/StepOne-and-StepOnePlus-Real-Time-PCR-System.html">https://www.thermofisher.com/cz/en/home/technical-resources/software-downloads/StepOne-and-StepOnePlus-Real-Time-PCR-System.html</a>).</p> <p>Flow cytometry data was acquired by BD FACSDiva™ Software v9.0 and CytExpert software v2.4.</p> <p>In vivo bioluminescence data was obtained by Bruker MI SE 7.2 (<a href="https://www.bruker.com/protected/en/services/software-downloads/molecular-imaging.html">https://www.bruker.com/protected/en/services/software-downloads/molecular-imaging.html</a>).</p>                                                                                                                                                                                                                                                                                                                                                               |
| Data analysis   | <p>Plots were generated and statistically analyzed in GraphPad Prism 5.</p> <p>Flow cytometry data was analyzed in FlowJo v10.</p> <p>In vivo bioluminescence data were analysed in Bruker MI SE 7.2 (<a href="https://www.bruker.com/protected/en/services/software-downloads/molecular-imaging.html">https://www.bruker.com/protected/en/services/software-downloads/molecular-imaging.html</a>).</p> <p>Mass spectrometry data analysis was performed using MaxQuant 1.6.3.4 and Perseus 1.6.1.3 software.</p> <p>Densitometry analysis of immunoblots was performed using ImageJ v1.49 (National Institutes of Health).</p> <p>Multivariate Cox proportional hazard model was computed using R 4.0.3 and survival v3.2.11 package.</p> <p>Survival analysis was statistically evaluated in the SPSS software (IBM Corp. Released 2017. IBM SPSS Statistics for Windows, Version 25.0.0.1 Armonk, NY: IBM Corp.) and software R version 4.0.1. (<a href="http://www.r-project.org">www.r-project.org</a>).</p> <p>Cubic spline analysis was performed using rms v6.2-0 R package and R v4.0.5.</p> |

For manuscripts utilizing custom algorithms or software that are central to the research but not yet described in published literature, software must be made available to editors and reviewers. We strongly encourage code deposition in a community repository (e.g. GitHub). See the Nature Portfolio [guidelines for submitting code & software](#) for further information.

## Data

Policy information about [availability of data](#)

All manuscripts must include a [data availability statement](#). This statement should provide the following information, where applicable:

- Accession codes, unique identifiers, or web links for publicly available datasets
- A description of any restrictions on data availability
- For clinical datasets or third party data, please ensure that the statement adheres to our [policy](#)

The raw data of related to the patient cohort are deposited in the Czech Registry of Monoclonal Gammopathies and are available under restricted access, access can be obtained upon request. The raw proteomic data were deposited in the PRIDE database under accession number: PXD037309. Microarray and survival data for MM patients from Goswami CP et al., 2013 and Myeloma Institute for Research and Therapy, Donna D. and Donald M. Lambert Laboratory of Myeloma Genetics are publicly available from GEO database under accession numbers GSE2658 and GSE4581 respectively. Gene expression data in B cell lineage from Jourdan et al., 2014 is available at [http://www.genomicscape.com/microarray/data\\_management.php?view=2](http://www.genomicscape.com/microarray/data_management.php?view=2). Gene expression in human immune cells data from Benjamin J. Schmiedel et al., 2018 is available at <https://dice-database.org/landing>. The remaining data are available within the Article, Supplementary Information file and Source Data file.

## Human research participants

Policy information about [studies involving human research participants and Sex and Gender in Research](#).

|                             |                                                                                                                                                                                                                                                                                                            |
|-----------------------------|------------------------------------------------------------------------------------------------------------------------------------------------------------------------------------------------------------------------------------------------------------------------------------------------------------|
| Reporting on sex and gender | Findings in this study are not related to one sex.                                                                                                                                                                                                                                                         |
| Population characteristics  | The study included only patients diagnosed with multiple myeloma. The clinical characteristics are described in the Supplementary Table 1 and 2.                                                                                                                                                           |
| Recruitment                 | Only patients diagnosed with multiple myeloma were included in the study.                                                                                                                                                                                                                                  |
| Ethics oversight            | All patients gave a written informed consent before sample collection. The bone marrow collection and the study protocol were approved by the Ethical Committee of the University Hospital Ostrava. The bone marrow aspirates used in the study were stored in Biobank of the University Hospital Ostrava. |

Note that full information on the approval of the study protocol must also be provided in the manuscript.

## Field-specific reporting

Please select the one below that is the best fit for your research. If you are not sure, read the appropriate sections before making your selection.

- Life sciences     Behavioural & social sciences     Ecological, evolutionary & environmental sciences

For a reference copy of the document with all sections, see [nature.com/documents/nr-reporting-summary-flat.pdf](https://www.nature.com/documents/nr-reporting-summary-flat.pdf)

## Life sciences study design

All studies must disclose on these points even when the disclosure is negative.

|                 |                                                                                                                                                                                                                                                                                                                            |
|-----------------|----------------------------------------------------------------------------------------------------------------------------------------------------------------------------------------------------------------------------------------------------------------------------------------------------------------------------|
| Sample size     | For experiments with patients biological materials sample size was not precalculated due to limited by availability of bio-material. In vivo experiments were performed with 4 mice in each group based on previous studies using same cell line for xenografts (Berahovich et al. 2017, PMID: 30208593).                  |
| Data exclusions | No data was excluded in the analyses.                                                                                                                                                                                                                                                                                      |
| Replication     | All experiments were performed in at least 2 or more biological replicates. Experiments with patients samples were performed without biological replicates due to limited source of materials. No replicates were excluded from this study. All replicates displayed effects similar to those presented in the manuscript. |
| Randomization   | Mice for in vivo experiments were randomly divided into two groups and recieved either WT or KD cells as xenograft. All additional experiments were performed in blinding manner to ensure no bias in subsequent analysis.                                                                                                 |
| Blinding        | All experiments were performed in blinded manner to ensure no bias in subsequent analysis. No clinical data about patients was known prior qPCR, ELISA and WB analysis.                                                                                                                                                    |

## Reporting for specific materials, systems and methods

We require information from authors about some types of materials, experimental systems and methods used in many studies. Here, indicate whether each material, system or method listed is relevant to your study. If you are not sure if a list item applies to your research, read the appropriate section before selecting a response.

## Materials & experimental systems

| n/a                                 | Involvement in the study                                        |
|-------------------------------------|-----------------------------------------------------------------|
| <input type="checkbox"/>            | <input checked="" type="checkbox"/> Antibodies                  |
| <input type="checkbox"/>            | <input checked="" type="checkbox"/> Eukaryotic cell lines       |
| <input checked="" type="checkbox"/> | <input type="checkbox"/> Palaeontology and archaeology          |
| <input type="checkbox"/>            | <input checked="" type="checkbox"/> Animals and other organisms |
| <input checked="" type="checkbox"/> | <input type="checkbox"/> Clinical data                          |
| <input checked="" type="checkbox"/> | <input type="checkbox"/> Dual use research of concern           |

## Methods

| n/a                                 | Involvement in the study                           |
|-------------------------------------|----------------------------------------------------|
| <input checked="" type="checkbox"/> | <input type="checkbox"/> ChIP-seq                  |
| <input type="checkbox"/>            | <input checked="" type="checkbox"/> Flow cytometry |
| <input checked="" type="checkbox"/> | <input type="checkbox"/> MRI-based neuroimaging    |

## Antibodies

### Antibodies used

Mouse monoclonal anti- $\beta$ -Actin, clone 8H10D10, Cell Signaling Technology , Cat#: 3700S  
 Mouse monoclonal anti-FLAG, clone M2, Sigma Aldrich , Cat#: F1804  
 Mouse monoclonal anti-GAPDH, clone D4C6R, Cell Signaling Technology , Cat#: 97166S  
 Rat monoclonal anti-HA, clone 3F10, Roche, Cat#: 11867423001  
 Mouse monoclonal anti-Puromycin, clone 12D10, Sigma Aldrich , Cat#: MABE343  
 Mouse polyclonal anti-Human IgG (H+L), Sigma Aldrich , Cat#: SAB3701329  
 Polyclonal anti-Human Ig lambda antibody labelled with APC-C750 , Cytognos, S.L. , Cat#: CYT-LAC750  
 Rabbit monoclonal anti-KEAP1, D6B12, Cell Signaling Technology , Cat#: 8047S  
 Rabbit polyclonal anti-OTUD1 sera, Moravian Biotechnology , N/A  
 Mouse monoclonal anti-PolyHistidine, clone HIS1, Sigma Aldrich , Cat#: H1029  
 Mouse monoclonal anti-PRDX4, Proteintech , Cat#: 60286-1-Ig  
 Rabbit polyclonal anti-PRDX4, Proteintech , Cat#: 10703-1-AP  
 Rabbit polyclonal anti-PSMC5, Bethyl Laboratories , Cat#: A303-825A  
 Mouse monoclonal anti-Ubiquitin, clone P4D1, Cell Signaling Technology , Cat#: 3936S  
 Rabbit monoclonal anti-phospho-eIF2a (Ser51), clone D9G8, Cell Signaling Technology , Cat#: 3398  
 Rabbit monoclonal anti-ATF6, clone D4Z8V, Cell Signaling Technology , Cat#: 65880S  
 Mouse monoclonal anti-calnexin, clone E10, Santa Cruz, Cat#: sc-46669  
 Rabbit polyclonal anti-PDIA6, Bethyl, Cat#: A304-519A  
 Rabbit monoclonal anti-PCNA, clone D3H8P, Cell Signaling Technology , Cat#: 13110S  
 Rabbit polyclonal anti-PSMB5, Proteintech , Cat#: 19178-1-AP  
 Rabbit polyclonal anti-PSMC6, Bethyl, Cat#: A303-825A  
 Mouse monoclonal anti-PSMA2, clone B4, Santa Cruz, Cat#: sc-377148  
 Mouse monoclonal anti-PSMB1, clone D9, Santa Cruz, Cat#: sc-374405  
 Mouse monoclonal anti-PSMB7, clone H3, Santa Cruz, Cat#: sc-365725  
 Goat polyclonal HRP-conjugated anti-rabbit, Jackson ImmunoResearch, Cat#: 115-035-144  
 Goat polyclonal HRP-conjugated anti-mouse, Jackson ImmunoResearch, Cat#: 115-035-146  
 Goat polyclonal HRP-conjugated anti-rat IgG, Cytiva, Cat#:NA935

### Validation

All commercially available antibodies have been tested by manufacturer for the use in western blot, immunoprecipitation or flow cytometry and applied accordingly in the study.  
 Custom anti-OTUD1 polyclonal rabbit sera was validated for use in western blotting on lysates from human cell lines with wild type and knock out OTUD1 and using purified recombinant human full length OTUD1 protein.

## Eukaryotic cell lines

Policy information about [cell lines and Sex and Gender in Research](#)

### Cell line source(s)

Human RPMI8226 cell line, ATCC , Cat#: CCL-155  
 Human MM.1S cell line, ATCC, Cat#: CRL-2974  
 Human JIN-3 cell line, DSMZ, Cat#: ACC 541  
 Human SK-MM-2 cell line, DSMZ, Cat#: ACC 430  
 Human 293FT cell line, Invitrogen, Cat#: R70007  
 Human HEK 293 cell line, ATCC, Cat#: CRL-1573

### Authentication

Cell lines were not authenticated after receiving from ATCC, DSMZ or Invitrogen. For all cell lines-involving experiments, only low passage number cells (n<10) were used.

### Mycoplasma contamination

Cell lines were regularly tested negative for mycoplasma contamination.

### Commonly misidentified lines (See [ICLAC](#) register)

None of the used cell lines is present in the ICLAC register.

## Animals and other research organisms

Policy information about [studies involving animals](#); [ARRIVE guidelines](#) recommended for reporting animal research, and [Sex and Gender in Research](#)

|                         |                                                                                                                                                                                                                                        |
|-------------------------|----------------------------------------------------------------------------------------------------------------------------------------------------------------------------------------------------------------------------------------|
| Laboratory animals      | Female SCID Mice CB17/lcr-Prkdc-scid/lcrIcoCrI, 7 weeks old. Mice were held in IVC cages at ambient temperature (22°C), 50% humidity with 12h light/dark cycle.                                                                        |
| Wild animals            | The study did not involve wild animals.                                                                                                                                                                                                |
| Reporting on sex        | The results does not apply to specific sex.                                                                                                                                                                                            |
| Field-collected samples | No field-collected samples were used in this study.                                                                                                                                                                                    |
| Ethics oversight        | All animal experiments were approved by the Animal Ethics Committee of the Faculty of Medicine, Ostrava University and the Animal Ethic Board of the Ministry of Education, Youth and Sport of the Czech Republic n. MSMT-4072/2021-3. |

Note that full information on the approval of the study protocol must also be provided in the manuscript.

## Flow Cytometry

### Plots

Confirm that:

- The axis labels state the marker and fluorochrome used (e.g. CD4-FITC).
- The axis scales are clearly visible. Include numbers along axes only for bottom left plot of group (a 'group' is an analysis of identical markers).
- All plots are contour plots with outliers or pseudocolor plots.
- A numerical value for number of cells or percentage (with statistics) is provided.

### Methodology

|                           |                                                                                                                                                                                                                                                                                                                                                                                                                                                                                                                                                                                          |
|---------------------------|------------------------------------------------------------------------------------------------------------------------------------------------------------------------------------------------------------------------------------------------------------------------------------------------------------------------------------------------------------------------------------------------------------------------------------------------------------------------------------------------------------------------------------------------------------------------------------------|
| Sample preparation        | Bone marrow aspirates were diluted in the Red Blood Cell lysis buffer (155 mM NH <sub>4</sub> Cl, 12 mM NaHCO <sub>3</sub> , 0.1 mM EDTA; 1 ml to 10 ratio) and incubated at room temperature for 15 min. Aberrant plasma cell phenotype was determined according to EuroFlow protocol (stained for CD38, CD138, CD45, CD56, CD117, CD27), cells were sorted and processed immediately. For the in vivo experiment after mice sacrifice, tumor xenografts were mechanically dissociated into single-cell suspension and ilgL content and GFP expression were analyzed by flow cytometry. |
| Instrument                | Flow cytometry experiments were performed on BD FACSAria II and CytoFLEX S.                                                                                                                                                                                                                                                                                                                                                                                                                                                                                                              |
| Software                  | BD FACSDiva™ Software v9.0 and CytExpert v2.4 were used for data collection, FlowJo v10 was used for data analysis.                                                                                                                                                                                                                                                                                                                                                                                                                                                                      |
| Cell population abundance | Aberrant plasma cells were determined by staining with antibody panel (CD38, CD138, CD45, CD56, CD117, CD27) according to the EuroFlow protocol. Infiltration for different samples varied from 8 to 87%.                                                                                                                                                                                                                                                                                                                                                                                |
| Gating strategy           | For flow cytometry of myeloma cells following gating strategy was used: Homogenous in size and granularity cell population was gated on FSC-A/SSC-A plot to separate from cell debris, then on FSC-A/FSC-H cells were gated to exclude duplets. Then dead cells were excluded according to Live/Dead fixable staining. For OTUD1 OE cells, GFP positive cells were gated.                                                                                                                                                                                                                |

- Tick this box to confirm that a figure exemplifying the gating strategy is provided in the Supplementary Information.
